# Supplementary material for: Improving virtual screening of G protein-coupled receptors via ligand-directed modeling
Source: PubMed Central journal article supplement (PMC5708846; doi:10.1371/journal.pcbi.1005819), 2017-11-13
Supplement: pcbi.1005819.s001.pdf [file pcbi.1005819.s001.pdf]

| Step                                                                                                                                                                                                                                            | Method                                                                                                                           | Parameters                                                                                                                                                                                                             |
|-------------------------------------------------------------------------------------------------------------------------------------------------------------------------------------------------------------------------------------------------|----------------------------------------------------------------------------------------------------------------------------------|------------------------------------------------------------------------------------------------------------------------------------------------------------------------------------------------------------------------|
| <ul style="list-style-type: none"> <li>Preparation</li> </ul>                                                                                                                                                                                   |                                                                                                                                  |                                                                                                                                                                                                                        |
| <ul style="list-style-type: none"> <li> <ul style="list-style-type: none"> <li>Binding pocket</li> <li>Cytoplasmic residues</li> </ul> </li> </ul>                                                                                              | Run ICMPocketFinder, select residues around pocket<br>Define cytoplasmic domain by selecting Ballosteros-Weinstein (BW) residues | 1.5 Å radius around pocket.<br>BW cytoplasmic residues: 1.48, 2.51, 3.38, 4.51, 5.50, 6.43, 7.45                                                                                                                       |
| <ul style="list-style-type: none"> <li>Independent replica</li> </ul>                                                                                                                                                                           |                                                                                                                                  | 80 replicas                                                                                                                                                                                                            |
| <ul style="list-style-type: none"> <li> <ul style="list-style-type: none"> <li>Initialise</li> </ul> </li> </ul>                                                                                                                                |                                                                                                                                  |                                                                                                                                                                                                                        |
| <ul style="list-style-type: none"> <li> <ul style="list-style-type: none"> <li> <ul style="list-style-type: none"> <li>Minimise</li> </ul> </li> </ul> </li> </ul>                                                                              | GROMACS with explicit waters                                                                                                     | FFGMX forcefield, water model SPC, Electrostatics: PME and epsilon_r=1, default pdb2gmx residue charge, BFGS method, 5000 steps.                                                                                       |
| <ul style="list-style-type: none"> <li> <ul style="list-style-type: none"> <li> <ul style="list-style-type: none"> <li>Starting structure</li> </ul> </li> </ul> </li> </ul>                                                                    | CONCOORD generate conformation                                                                                                   | x1 conformation. Use input as reference. 10000 regularisation steps.                                                                                                                                                   |
| <ul style="list-style-type: none"> <li> <ul style="list-style-type: none"> <li>Iterative rounds</li> </ul> </li> </ul>                                                                                                                          |                                                                                                                                  | 8 iterative rounds                                                                                                                                                                                                     |
| <ul style="list-style-type: none"> <li> <ul style="list-style-type: none"> <li> <ul style="list-style-type: none"> <li>Directory</li> </ul> </li> </ul> </li> </ul>                                                                             |                                                                                                                                  | 20 directories                                                                                                                                                                                                         |
| <ul style="list-style-type: none"> <li> <ul style="list-style-type: none"> <li> <ul style="list-style-type: none"> <li> <ul style="list-style-type: none"> <li>Sample receptor main chain</li> </ul> </li> </ul> </li> </ul> </li> </ul>        | CONCOORD generate conformations                                                                                                  | x30 conformations. Minimum 200 distance definition for each atom. Fix cytoplasmic residues. Use random seed.                                                                                                           |
| <ul style="list-style-type: none"> <li> <ul style="list-style-type: none"> <li> <ul style="list-style-type: none"> <li> <ul style="list-style-type: none"> <li>Select receptor</li> </ul> </li> </ul> </li> </ul> </li> </ul>                   | Select conformations under a maximum RMSD from the input                                                                         | < 1.2 Å RMSD.                                                                                                                                                                                                          |
| <ul style="list-style-type: none"> <li> <ul style="list-style-type: none"> <li> <ul style="list-style-type: none"> <li> <ul style="list-style-type: none"> <li>Sample binding pocket side chains</li> </ul> </li> </ul> </li> </ul> </li> </ul> | tCONCOORD generate conformations                                                                                                 | x5 conformations. Sample binding pocket side chains only.                                                                                                                                                              |
| <ul style="list-style-type: none"> <li> <ul style="list-style-type: none"> <li> <ul style="list-style-type: none"> <li> <ul style="list-style-type: none"> <li>Select binding pocket</li> </ul> </li> </ul> </li> </ul> </li> </ul>             | Select conformations that conserved % of binding pocket polar residues from input                                                | 8/10 polar residues.                                                                                                                                                                                                   |
| <ul style="list-style-type: none"> <li> <ul style="list-style-type: none"> <li> <ul style="list-style-type: none"> <li> <ul style="list-style-type: none"> <li>Rebuild</li> </ul> </li> </ul> </li> </ul> </li> </ul>                           | Add cytoplasm side chains with scoomp                                                                                            | Consider ligand in energy calculations (Identical to minimisation above)                                                                                                                                               |
| <ul style="list-style-type: none"> <li> <ul style="list-style-type: none"> <li> <ul style="list-style-type: none"> <li> <ul style="list-style-type: none"> <li>Minimise</li> </ul> </li> </ul> </li> </ul> </li> </ul>                          | GROMACS with explicit waters                                                                                                     |                                                                                                                                                                                                                        |
| <ul style="list-style-type: none"> <li> <ul style="list-style-type: none"> <li> <ul style="list-style-type: none"> <li> <ul style="list-style-type: none"> <li>Dock</li> </ul> </li> </ul> </li> </ul> </li> </ul>                              | ICM docking, binding pocket refinement                                                                                           | Flexible ligand docking to pre-calculated energy grid. Docking effort: 5. Select best scored conformation. Refine residues 2 Å around ligand.                                                                          |
| <ul style="list-style-type: none"> <li> <ul style="list-style-type: none"> <li> <ul style="list-style-type: none"> <li>Score</li> </ul> </li> </ul> </li> </ul>                                                                                 | Score docked pose with ICM, receptor with OPUS_PSP                                                                               |                                                                                                                                                                                                                        |
| <ul style="list-style-type: none"> <li> <ul style="list-style-type: none"> <li>Scoring</li> </ul> </li> </ul>                                                                                                                                   |                                                                                                                                  |                                                                                                                                                                                                                        |
| <ul style="list-style-type: none"> <li> <ul style="list-style-type: none"> <li> <ul style="list-style-type: none"> <li>Select</li> </ul> </li> </ul> </li> </ul>                                                                                | Best ICM scored from complexes in this directory                                                                                 |                                                                                                                                                                                                                        |
| <ul style="list-style-type: none"> <li>Final scoring (quantitative and qualitative)</li> </ul>                                                                                                                                                  | OPUS-ICM rank all complexes and cluster by IFP                                                                                   | Up to 1,920,000 complexes generated and up to 640 LDM complexes ranked by OPUS-ICM. The top 25 LDM complexes are clustered by IFP. Analyse best scoring LDM complex from each cluster at cutoff ~0.7 Jaccard distance. |

## References

1. Kabsch W, Sander C. Dictionary of protein secondary structure: pattern recognition of hydrogen-bonded and geometrical features. *Biopolymers*. 1983;22: 2577–2637.
2. Jorgensen WL, Tirado-Rives J. The OPLS [optimized potentials for liquid simulations] potential functions for proteins, energy minimizations for crystals of cyclic peptides and crambin. *J Am Chem Soc*. 1988;110: 1657–1666.
