# Supplementary material for: Improving virtual screening of G protein-coupled receptors via ligand-directed modeling
Source: PubMed Central journal article supplement (PMC5708846; doi:10.1371/journal.pcbi.1005819), 2017-11-13
Supplement: pcbi.1005819.s002.pdf [file pcbi.1005819.s002.pdf]

| GPCR<br>(abbreviation<br>and full<br>name) | Bound<br>ligand<br>pharma<br>cology | PDB<br>code | Resolution<br>(Å) | Stabilization                             |                                                                                     |                                                                                                                                             |                                                            |                  | Reference                |
|--------------------------------------------|-------------------------------------|-------------|-------------------|-------------------------------------------|-------------------------------------------------------------------------------------|---------------------------------------------------------------------------------------------------------------------------------------------|------------------------------------------------------------|------------------|--------------------------|
|                                            |                                     |             |                   | Ligand<br>(abbreviation<br>and full name) | Ligand structure                                                                    | Mutations in the<br>TM and<br>ECL2-distal<br>domain (Residues<br>within a 4 Å radius<br>of the bound X-ray<br>ligand are marked<br>in bold) | Insertion<br>(insertion<br>protein [1]<br>and<br>location) | Other<br>protein |                          |
| AA2AR<br>(adenosine<br>A2a<br>receptor)    | agonist                             | 2YDV        | 2.6               | NEC<br>(NECA)                             | 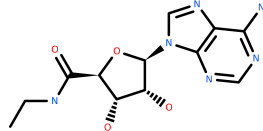  | L48A, A54L, T65A,<br><b>Q89A</b>                                                                                                            | -                                                          | -                | Lebon et<br>al. 2011 [2] |
|                                            |                                     | 3QAK        | 2.7               | UK<br>(UK-432,097)                        |  | -                                                                                                                                           | T4L<br>(ICL3)                                              | -                | Xu et al.<br>2011 [3]    |

|           |      |     |                    |                                                                                      |                                                                                                               |                |   |                            |
|-----------|------|-----|--------------------|--------------------------------------------------------------------------------------|---------------------------------------------------------------------------------------------------------------|----------------|---|----------------------------|
| inhibitor | 3PWH | 3.3 | ZM<br>(ZM-241,385) | 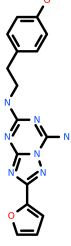  | A54L, T88A,<br>K122A, L202A,<br>L235A, V239A,<br>S277A                                                        | -              | - | Doré et al.<br>2011 [4]    |
|           | 4EIY | 1.8 | ZM<br>(ZM-241,385) |   | -                                                                                                             | BRIL<br>(ICL3) | - | Liu et al.<br>2012 [5]     |
|           | 3EML | 2.6 | ZM<br>(ZM-241,385) |  | -<br><br>(mutations<br>introduced for LDM<br>experiment<br>3EML-ZM to<br>2YDV-NEC: L48A,<br>A54L, T65A, Q89A) | T4L<br>(ICL3)  | - | Jaakola et<br>al. 2008 [6] |

|                                            |         |      |     |                                        |                                                                                       |                                                               |   |          |                                  |
|--------------------------------------------|---------|------|-----|----------------------------------------|---------------------------------------------------------------------------------------|---------------------------------------------------------------|---|----------|----------------------------------|
|                                            |         | 3RFM | 3.6 | CAF<br>(caffeine)                      | 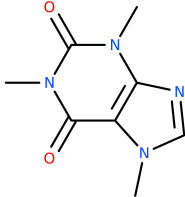   | A54L, T88A,<br>K122A, L202A,<br>L235A, V239A,<br>S277A        | - | -        | Doré et al.<br>2011 [4]          |
|                                            |         | 3UZA | 3.3 | T4G<br>(1,2,4-triazine<br>4g)          |    | A54L, T88A,<br>K122A, L202A,<br>L235A, V239A,<br><b>S277A</b> | - | -        | Congreve<br>et al. 2012<br>[7]   |
|                                            |         | 3REY | 3.3 | XAC<br>(xanthine<br>amine<br>congener) |   | A54L, T88A,<br>K122A, L202A,<br>L235A, V239A,<br>S277A        | - | -        | Doré et al.<br>2011 [4]          |
| B2AR<br>(beta-2<br>adrenergic<br>receptor) | agonist | 3POG | 3.5 | BI<br>(BI-167,107)                     |  | -                                                             | - | Nanobody | Rasmusse<br>n et al.<br>2011 [8] |

|  |  |      |     |                                         |                                                                                                                                                                                                                                                                                                                        |   |                 |          |                         |
|--|--|------|-----|-----------------------------------------|------------------------------------------------------------------------------------------------------------------------------------------------------------------------------------------------------------------------------------------------------------------------------------------------------------------------|---|-----------------|----------|-------------------------|
|  |  | 4LDE | 2.8 | BI<br>(BI-167,107)                      | <p>The chemical structure of BI (BI-167,107) features a central benzimidazole ring system. It is substituted with a methyl group at the 2-position, a 2-methylphenyl group at the 4-position, and a 2-hydroxyethyl group at the 5-position. The nitrogen atoms in the benzimidazole ring are colored blue and red.</p> | - | T4L<br>(N-term) | Nanobody | Ring et al.<br>2013 [9] |
|  |  | 4LDO | 3.2 | ADR<br>(adrenaline)                     | <p>The chemical structure of ADR (adrenaline) consists of a benzene ring with two hydroxyl groups at the 3 and 4 positions. It is substituted at the 1 position with a 2-methylaminoethyl group. The amino group is colored blue.</p>                                                                                  | - | T4L<br>(N-term) | Nanobody | Ring et al.<br>2013 [9] |
|  |  | 4LDL | 3.1 | ISO<br>(hydroxybenzyl<br>isoproterenol) | <p>The chemical structure of ISO (hydroxybenzyl isoproterenol) features a benzene ring with two hydroxyl groups at the 3 and 4 positions. It is substituted at the 1 position with a 2-isopropylaminoethyl group. The amino group is colored blue.</p>                                                                 | - | T4L<br>(N-term) | Nanobody | Ring et al.<br>2013 [9] |

|           |      |     |                      |                                                                                     |       |               |   |                                 |
|-----------|------|-----|----------------------|-------------------------------------------------------------------------------------|-------|---------------|---|---------------------------------|
| inhibitor | 2RH1 | 2.4 | CAR<br>(carazolol)   | 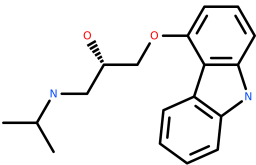  | -     | T4L<br>(ICL3) | - | Cherezov<br>et al. 2007<br>[10] |
|           | 3D4S | 2.8 | TIM<br>(timolol)     |   | E122W | T4L<br>(ICL3) | - | Hanson et<br>al. 2008<br>[11]   |
|           | 3NY8 | 2.8 | ICI<br>(ICI-118,551) |  | E122W | T4L<br>(ICL3) | - | Wacker et<br>al. 2010<br>[12]   |

|                                                     |           |      |     |                                                 |                                                                                     |       |               |          |                               |
|-----------------------------------------------------|-----------|------|-----|-------------------------------------------------|-------------------------------------------------------------------------------------|-------|---------------|----------|-------------------------------|
|                                                     |           | 3NY9 | 2.8 | KOL<br>(compound 2<br>from Kolb et al.<br>2009) | 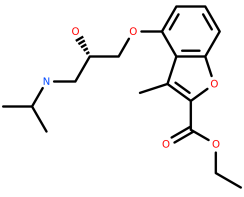  | E122W | T4L<br>(ICL3) | -        | Wacker et<br>al. 2010<br>[12] |
| M2R<br>(muscarinic<br>acetylcholine<br>receptor M2) | agonist   | 4MQS | 3.5 | IXO<br>(iperoxo)                                |   | -     | -             | Nanobody | Kruse et<br>al. 2013<br>[13]  |
|                                                     | inhibitor | 3UON | 3.0 | QNB<br>(3-quinuclidinyl-<br>benzilate)          |  | -     | T4L<br>(ICL3) | -        | Haga et al.<br>2012 [14]      |

|                                                 |                  |             |  |                              |                                                                                                                                                                                                                                                                                                                                                                                                                                       |                                |                          |          |                                   |
|-------------------------------------------------|------------------|-------------|--|------------------------------|---------------------------------------------------------------------------------------------------------------------------------------------------------------------------------------------------------------------------------------------------------------------------------------------------------------------------------------------------------------------------------------------------------------------------------------|--------------------------------|--------------------------|----------|-----------------------------------|
| <p>CCR5<br/>(C-C chemokine receptor type 5)</p> | <p>inhibitor</p> | <p>4MBS</p> |  | <p>MRV<br/>(maraviroc)</p>   | 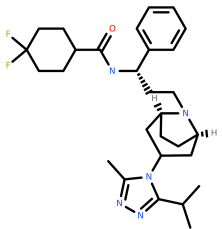 <p>The image shows the chemical structure of Maraviroc, a CCR5 inhibitor. It features a central benzimidazole ring system with a 2,4-dimethyl-5-isopropylbenzimidazole moiety attached to one nitrogen and a 2-(2,2,2-trifluoroethyl)acetamide group attached to the other. The benzimidazole ring is also substituted with a phenyl group.</p>    | <p>G163N, A233D,<br/>K303E</p> | <p>Rubredoxin (ICL3)</p> | <p>-</p> | <p>Tan et al. 2013 [15]</p>       |
| <p>H1R<br/>(histamine H1 receptor)</p>          | <p>inhibitor</p> | <p>3RZE</p> |  | <p>DOX<br/>(doxepin)</p>     |  <p>The image shows the chemical structure of Doxepin, an H1 receptor antagonist. It consists of a central benzene ring fused to a seven-membered ring containing an oxygen atom. A propyl chain with a dimethylamino group is attached to the benzene ring, and a 2,3-dihydro-1,4-benzodioxepin moiety is attached to the seven-membered ring.</p> | <p>-</p>                       | <p>T4L (ICL3)</p>        | <p>-</p> | <p>Shimamura et al. 2011 [16]</p> |
| <p>DOR<br/>(delta opioid receptor)</p>          | <p>inhibitor</p> | <p>4N6H</p> |  | <p>NAL<br/>(naltrindole)</p> |  <p>The image shows the chemical structure of Naltrindole, a delta opioid receptor antagonist. It features a complex polycyclic core with a benzimidazole ring system, a piperidine ring, and a cyclopropylmethyl group. The structure is highly substituted with various oxygen and nitrogen atoms.</p>                                           | <p>-</p>                       | <p>BRIL (N-term)</p>     | <p>-</p> | <p>Fenalti et al. 2014 [17]</p>   |

|                                                |           |      |  |                     |                                                                                     |       |                |   |                          |
|------------------------------------------------|-----------|------|--|---------------------|-------------------------------------------------------------------------------------|-------|----------------|---|--------------------------|
| 5-HT1B<br>(5-hydroxytryptamine<br>receptor 1B) | inhibitor | 4IAR |  | ERG<br>(ergotamine) | 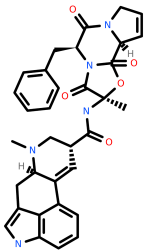 | L138W | BRIL<br>(ICL3) | - | Wang et al. 2013<br>[18] |
|------------------------------------------------|-----------|------|--|---------------------|-------------------------------------------------------------------------------------|-------|----------------|---|--------------------------|

## References

1. Chun E, Thompson AA, Liu W, Roth CB, Griffith MT, Katritch V, et al. Fusion partner toolchest for the stabilization and crystallization of G protein-coupled receptors. *Structure*. Elsevier Ltd; 2012;20: 967–976.
2. Lebon G, Warne T, Edwards PC, Bennett K, Langmead CJ, Leslie AGW, et al. Agonist-bound adenosine A2A receptor structures reveal common features of GPCR activation. *Nature*. Nature Publishing Group; 2011;474: 521–525.
3. Xu F, Wu H, Katritch V, Han GW, Jacobson KA, Gao Z-G, et al. Structure of an agonist-bound human A2A adenosine receptor. *Science*. American Association for the Advancement of Science; 2011;332: 322–327.
4. Doré AS, Robertson N, Errey JC, Ng I, Hollenstein K, Tehan B, et al. Structure of the adenosine A(2A) receptor in complex with ZM241385 and the xanthines XAC and caffeine. *Structure*. 2011;19: 1283–1293.
5. Liu W, Chun E, Thompson AA, Chubukov P, Xu F, Katritch V, et al. Structural basis for allosteric regulation of GPCRs by sodium ions. *Science*. 2012;337: 232–236.
6. Jaakola V-P, Griffith MT, Hanson MA, Cherezov V, Chien EYT, Lane JR, et al. The 2.6 angstrom crystal structure of a human A2A adenosine receptor bound to an antagonist. *Science*. 2008;322: 1211–1217.
7. Congreve M, Andrews SP, Doré AS, Hollenstein K, Hurrell E, Langmead CJ, et al. Discovery of 1,2,4-Triazine Derivatives as Adenosine A2A Antagonists using Structure Based Drug Design. *J Med Chem*. 2012;55: 1898–1903.
8. Rasmussen SGF, Choi H-J, Fung JJ, Pardon E, Casarosa P, Chae PS, et al. Structure of a nanobody-stabilized active state of



the  $\beta(2)$  adrenoceptor. *Nature*. Nature Publishing Group; 2011;469: 175–180.

9. Ring AM, Manglik A, Kruse AC, Enos MD, Weis WI, Garcia KC, et al. Adrenaline-activated structure of  $\beta 2$ -adrenoceptor stabilized by an engineered nanobody. *Nature*. Nature Publishing Group; 2013;502: 575–579.
10. Cherezov V, Rosenbaum DM, Hanson MA, Rasmussen SGF, Thian FS, Kobilka TS, et al. High-resolution crystal structure of an engineered human beta2-adrenergic G protein-coupled receptor. *Science*. 2007;318: 1258–1265.
11. Hanson MA, Cherezov V, Griffith MT, Roth CB, Jaakola V-P, Chien EYT, et al. A specific cholesterol binding site is established by the 2.8 Å structure of the human beta2-adrenergic receptor. *Structure*. 2008;16: 897–905.
12. Wacker D, Fenalti G, Brown MA, Katritch V, Abagyan R, Cherezov V, et al. Conserved binding mode of human beta2 adrenergic receptor inverse agonists and antagonist revealed by X-ray crystallography. *J Am Chem Soc*. 2010;132: 11443–11445.
13. Kruse AC, Ring AM, Manglik A, Hu J, Hu K, Eitel K, et al. Activation and allosteric modulation of a muscarinic acetylcholine receptor. *Nature*. 2013;504: 101–106.
14. Haga K, Kruse AC, Asada H, Yurugi-Kobayashi T, Shiroishi M, Zhang C, et al. Structure of the human M2 muscarinic acetylcholine receptor bound to an antagonist. *Nature*. Nature Publishing Group; 2012;482: 547–551.
15. Tan Q, Zhu Y, Li J, Chen Z, Han GW, Kufareva I. Structure of the CCR5 Chemokine receptor–HIV entry inhibitor maraviroc complex. *Science*. 2013;341: 1387–1390.
16. Shimamura T, Shiroishi M, Weyand S, Tsujimoto H, Winter G, Katritch V, et al. Structure of the human histamine H1 receptor complex with doxepin. *Nature*. Nature Publishing Group; 2011;475: 65–70.
17. Fenalti G, Giguere PM, Katritch V, Huang X-P, Thompson AA, Cherezov V, et al. Molecular control of  $\delta$ -opioid receptor signalling. *Nature*. Nature Publishing Group; 2014;506: 191–196.
18. Wang C, Jiang Y, Ma J, Wu H, Wacker D, Katritch V, et al. Structural basis for molecular recognition at serotonin receptors. *Science*. 2013;340: 610–614.
