# Supplementary material for: Improving virtual screening of G protein-coupled receptors via ligand-directed modeling
Source: PubMed Central journal article supplement (PMC5708846; doi:10.1371/journal.pcbi.1005819), 2017-11-13
Supplement: pcbi.1005819.s003.pdf [file pcbi.1005819.s003.pdf]

| Scenario        | GPCR  | LDM experiment | LDM model | RMSD to destination<br>X-ray<br>structure<br>on ligand<br>heavy<br>atoms (Å) | NSQ_AUC<br>recovery | NSQ_AUC<br>selectivity | LDM experiment<br>figure |
|-----------------|-------|----------------|-----------|------------------------------------------------------------------------------|---------------------|------------------------|--------------------------|
| self refinement | AA2AR | 2YDV-NEC       | 2YDV-NEC  | 0.0                                                                          | 48.2                | 54.6                   | S12 Fig                  |
| self refinement | AA2AR | 2YDV-NEC       | LDM 000   | 0.77                                                                         | 9.6                 | 9.8                    | S12 Fig                  |
| self refinement | AA2AR | 2YDV-NEC       | LDM 005   | 0.53                                                                         | 14.7                | 3.3                    | S12 Fig                  |
| self refinement | AA2AR | 2YDV-NEC       | LDM 008   | 0.89                                                                         | 17.8                | 14.9                   | S12 Fig                  |
| self refinement | AA2AR | 3PWH-ZM        | 3PWH-ZM   | 0.0                                                                          | 29.1                | 53.3                   | S7 Fig                   |
| self refinement | AA2AR | 3PWH-ZM        | LDM 000   | 3.33                                                                         | 12.7                | -6.2                   | S7 Fig                   |
| self refinement | AA2AR | 3PWH-ZM        | LDM 001   | 1.36                                                                         | 16.2                | -4.0                   | S7 Fig                   |
| self refinement | AA2AR | 3PWH-ZM        | LDM 006   | 2.07                                                                         | 12.5                | 22.3                   | S7 Fig                   |
| self refinement | AA2AR | 3PWH-ZM        | LDM 010   | 5.43                                                                         | 30.5                | 23.1                   | S7 Fig                   |
| self refinement | AA2AR | 4EIY-ZM        | 4EIY-ZM   | 0.0                                                                          | 35.1                | 5.1                    | S6 Fig                   |
| self refinement | AA2AR | 4EIY-ZM        | LDM 000   | 9.34                                                                         | 17.2                | 6.0                    | S6 Fig                   |
| self refinement | AA2AR | 4EIY-ZM        | LDM 004   | 9.25                                                                         | 11.2                | -4.0                   | S6 Fig                   |
| self refinement | AA2AR | 4EIY-ZM        | LDM 008   | 3.35                                                                         | 34.8                | 20.4                   | S6 Fig                   |
| self refinement | AA2AR | 4EIY-ZM        | LDM 011   | 5.45                                                                         | -1.0                | 17.9                   | S6 Fig                   |
| self refinement | AA2AR | 4EIY-ZM        | LDM 013   | 3.33                                                                         | 31.2                | 15.3                   | S6 Fig                   |
| self refinement | AA2AR | 4EIY-ZM        | LDM 015   | 3.48                                                                         | 9.5                 | 18.4                   | S6 Fig                   |
| self refinement | B2AR  | 2RH1-CAR       | 2RH1-CAR  | 0.0                                                                          | 59.1                | 32.8                   | Fig 4                    |
| self refinement | B2AR  | 2RH1-CAR       | LDM 000   | 0.70                                                                         | 26.4                | -5.2                   | Fig 4                    |
| self refinement | B2AR  | 2RH1-CAR       | LDM 004   | 0.66                                                                         | 33.6                | 3.7                    | Fig 4                    |
| self refinement | B2AR  | 2RH1-CAR       | LDM 008   | 0.70                                                                         | 26.6                | -8.4                   | Fig 4                    |
| self refinement | B2AR  | 3P0G-BI        | 3P0G-BI   | 0.0                                                                          | 42.0                | 33.1                   | S5 Fig                   |
| self refinement | B2AR  | 3P0G-BI        | LDM 000   | 1.71                                                                         | 73.9                | 68.7                   | S5 Fig                   |
| self refinement | B2AR  | 3P0G-BI        | LDM 021   | 1.75                                                                         | 50.9                | 32.8                   | S5 Fig                   |
| self refinement | B2AR  | 4LDE-BI        | 4LDE-BI   | 0.0                                                                          | 62.3                | 44.1                   | Fig 3                    |
| self refinement | B2AR  | 4LDE-BI        | LDM 000   | 1.58                                                                         | 71.6                | 59.1                   | Fig 3                    |
| self refinement | B2AR  | 4LDE-BI        | LDM 021   | 1.56                                                                         | 80.0                | 64.5                   | Fig 3                    |
| self refinement | CCR5  | 4MBS-MRV       | 4MBS-MRV  | 0.0                                                                          | 59.5                | -                      | S13 Fig                  |
| self refinement | CCR5  | 4MBS-MRV       | LDM 000   | 3.68                                                                         | 20.4                | -                      | S13 Fig                  |
| self refinement | CCR5  | 4MBS-MRV       | LDM 003   | 6.42                                                                         | 8.5                 | -                      | S13 Fig                  |
| self refinement | CCR5  | 4MBS-MRV       | LDM 004   | 10.42                                                                        | 58.1                | -                      | S13 Fig                  |
| self refinement | CCR5  | 4MBS-MRV       | LDM 008   | 9.88                                                                         | 6.5                 | -                      | S13 Fig                  |
| self refinement | CCR5  | 4MBS-MRV       | LDM 009   | 8.62                                                                         | -13.5               | -                      | S13 Fig                  |

|                   |       |                    |          |      |       |       |         |
|-------------------|-------|--------------------|----------|------|-------|-------|---------|
| self refinement   | CCR5  | 4MBS-MRV           | LDM 012  | 6.32 | -8.4  | -     | S13 Fig |
| self refinement   | CCR5  | 4MBS-MRV           | LDM 013  | 1.61 | 12.0  | -     | S13 Fig |
| self refinement   | CCR5  | 4MBS-MRV           | LDM 015  | 8.30 | 8.3   | -     | S13 Fig |
| self refinement   | CCR5  | 4MBS-MRV           | LDM 019  | 1.61 | -11.1 | -     | S13 Fig |
| self refinement   | H1R   | 3RZE-DOX           | 3RZE-DOX | 0.0  | 48.1  | 14.9  | S10 Fig |
| self refinement   | H1R   | 3RZE-DOX           | LDM 000  | 0.96 | 43.9  | 38.9  | S10 Fig |
| self refinement   | H1R   | 3RZE-DOX           | LDM 001  | 5.42 | 17.8  | 10.5  | S10 Fig |
| self refinement   | H1R   | 3RZE-DOX           | LDM 004  | 0.96 | 32.4  | 38.8  | S10 Fig |
| self refinement   | H1R   | 3RZE-DOX           | LDM 007  | 1.15 | 38.0  | 30.7  | S10 Fig |
| self refinement   | H1R   | 3RZE-DOX           | LDM 010  | 2.37 | 7.4   | 55.9  | S10 Fig |
| self refinement   | H1R   | 3RZE-DOX           | LDM 018  | 5.57 | 19.2  | 38.9  | S10 Fig |
| self refinement   | M2R   | 3UON-QNB           | 3UON-QNB | 0.0  | 16.3  | 6.9   | S8 Fig  |
| self refinement   | M2R   | 3UON-QNB           | LDM 000  | 2.12 | -3.5  | 0.2   | S8 Fig  |
| self refinement   | M2R   | 3UON-QNB           | LDM 001  | 2.95 | 9.7   | 36.2  | S8 Fig  |
| self refinement   | M2R   | 4MQS-IXO           | 4MQS-IXO | 0.0  | 41.0  | 87.2  | S9 Fig  |
| self refinement   | M2R   | 4MQS-IXO           | LDM 000  | 1.50 | 44.7  | 91.2  | S9 Fig  |
| self refinement   | M2R   | 4MQS-IXO           | LDM 009  | 1.23 | 53.0  | 85.3  | S9 Fig  |
| self refinement   | M2R   | 4MQS-IXO           | LDM 022  | 6.00 | 2.1   | 77.2  | S9 Fig  |
| self refinement   | DOR   | 4N6H-NAL           | 4N6H-NAL | 0.0  | -19.1 | -17   | S14 Fig |
| self refinement   | DOR   | 4N6H-NAL           | LDM 000  | 8.16 | -30.2 | -26.2 | S14 Fig |
| self refinement   | DOR   | 4N6H-NAL           | LDM 001  | 8.17 | -31.8 | -32.2 | S14 Fig |
| self refinement   | DOR   | 4N6H-NAL           | LDM 003  | 3.88 | -26.9 | -33.6 | S14 Fig |
| self refinement   | DOR   | 4N6H-NAL           | LDM 008  | 8.41 | -20.0 | -16.6 | S14 Fig |
| self refinement   | DOR   | 4N6H-NAL           | LDM 014  | 4.25 | -13.7 | -13.6 | S14 Fig |
| self refinement   | 5HT1B | 4IAR-ERG           | 4IAR-ERG | 0.0  | 25.5  | 15.7  | S11 Fig |
| self refinement   | 5HT1B | 4IAR-ERG           | LDM 000  | 1.85 | 10.4  | 4.7   | S11 Fig |
| self refinement   | 5HT1B | 4IAR-ERG           | LDM 001  | 5.83 | -0.6  | -7.1  | S11 Fig |
| self refinement   | 5HT1B | 4IAR-ERG           | LDM 002  | 1.52 | 20.0  | 10.7  | S11 Fig |
| self refinement   | 5HT1B | 4IAR-ERG           | LDM 015  | 1.96 | 31.6  | 18.3  | S11 Fig |
| same pharmacology | AA2AR | 3PWH-ZM > 3RFM-CAF | 3PWH-ZM  | -    | 29.1  | 53.3  | Fig 6   |
| same pharmacology | AA2AR | 3PWH-ZM > 3RFM-CAF | 3RFM-CAF | 0.0  | 5.4   | -1.3  | Fig 6   |
| same pharmacology | AA2AR | 3PWH-ZM > 3RFM-CAF | LDM 000  | 4.29 | 8.6   | 42.2  | Fig 6   |
| same pharmacology | AA2AR | 3PWH-ZM > 3RFM-CAF | LDM 001  | 3.85 | 6.5   | 10.6  | Fig 6   |
| same pharmacology | AA2AR | 3PWH-ZM > 3RFM-CAF | LDM 002  | 9.75 | -14.8 | -3.2  | Fig 6   |
| same pharmacology | AA2AR | 3PWH-ZM > 3RFM-CAF | LDM 005  | 4.42 | -8.6  | 26.9  | Fig 6   |
| same pharmacology | AA2AR | 3PWH-ZM > 3RFM-CAF | LDM 008  | 7.79 | 5.0   | -0.9  | Fig 6   |
| same pharmacology | AA2AR | 3QAK-UK > 2YDV-NEC | 3QAK-UK  | -    | 34.4  | 40.7  | S14 Fig |
| same pharmacology | AA2AR | 3QAK-UK > 2YDV-NEC | 2YDV-NEC | 0.0  | 50.6  | 55.7  | S14 Fig |

|                     |       |                     |          |       |      |       |                  |
|---------------------|-------|---------------------|----------|-------|------|-------|------------------|
| same pharmacology   | AA2AR | 3QAK-UK > 2YDV-NEC  | LDM 000  | 0.81  | 25.0 | 30.2  | S14 Fig          |
| same pharmacology   | AA2AR | 3QAK-UK > 2YDV-NEC  | LDM 001  | 0.58  | 12.2 | 9.5   | S14 Fig          |
| same pharmacology   | AA2AR | 3QAK-UK > 2YDV-NEC  | LDM 002  | 0.97  | 41.7 | 46.8  | S14 Fig          |
| same pharmacology   | AA2AR | 3QAK-UK > 2YDV-NEC  | LDM 009  | 0.96  | 32.0 | 31.6  | S14 Fig          |
| same pharmacology   | AA2AR | 3UZA-T4G > 3REY-XAC | 3UZA-T4G | -     | 15.4 | 13.4  | S19 Fig          |
| same pharmacology   | AA2AR | 3UZA-T4G > 3REY-XAC | 3REY-XAC | 0.0   | 0.0  | -2.4  | S19 Fig          |
| same pharmacology   | AA2AR | 3UZA-T4G > 3REY-XAC | LDM 000  | 6.18  | 6.4  | -4.6  | S19 Fig          |
| same pharmacology   | AA2AR | 3UZA-T4G > 3REY-XAC | LDM 001  | 11.16 | 5.0  | 21.8  | S19 Fig          |
| same pharmacology   | AA2AR | 3UZA-T4G > 3REY-XAC | LDM 004  | 12.44 | 9.8  | 19.0  | S19 Fig          |
| same pharmacology   | AA2AR | 3UZA-T4G > 3REY-XAC | LDM 008  | 9.09  | 4.9  | 15.2  | S19 Fig          |
| same pharmacology   | B2AR  | 3D4S-TIM > 3NY8-ICI | 3D4S-TIM | -     | 43.8 | 5.1   | S17 and S18 Figs |
| same pharmacology   | B2AR  | 3D4S-TIM > 3NY8-ICI | 3NY8-ICI | 0.0   | 50.7 | 20.5  | S17 and S18 Figs |
| same pharmacology   | B2AR  | 3D4S-TIM > 3NY8-ICI | LDM 000  | 10.07 | 8.3  | -10.6 | S17 and S18 Figs |
| same pharmacology   | B2AR  | 3D4S-TIM > 3NY8-ICI | LDM 001  | 9.67  | 6.6  | -10.3 | S17 and S18 Figs |
| same pharmacology   | B2AR  | 3D4S-TIM > 3NY8-ICI | LDM 017  | 1.21  | 22.0 | -12.0 | S17 and S18 Figs |
| same pharmacology   | B2AR  | 3D4S-TIM > 3NY8-ICI | LDM 019  | 1.12  | 27.9 | -0.6  | S17 and S18 Figs |
| same pharmacology   | B2AR  | 3D4S-TIM > 3NY8-ICI | LDM 020  | 1.42  | 33.3 | 9.2   | S17 and S18 Figs |
| same pharmacology   | B2AR  | 3D4S-TIM > 3NY8-ICI | LDM 023  | 1.06  | 37.1 | 4.4   | S17 and S18 Figs |
| same pharmacology   | B2AR  | 3D4S-TIM > 3NY8-ICI | LDM 024  | 8.98  | 17.0 | -25.7 | S17 and S18 Figs |
| same pharmacology   | B2AR  | 3NY9-KOL > 2RH1-CAR | 3NY9-KOL | -     | 14.3 | -27.2 | S15 Fig          |
| same pharmacology   | B2AR  | 3NY9-KOL > 2RH1-CAR | 2RH1-CAR | 0.0   | 61.2 | 34.0  | S15 Fig          |
| same pharmacology   | B2AR  | 3NY9-KOL > 2RH1-CAR | LDM 000  | 1.45  | 26.3 | 10.9  | S15 Fig          |
| same pharmacology   | B2AR  | 3NY9-KOL > 2RH1-CAR | LDM 003  | 0.90  | 26.7 | 5.3   | S15 Fig          |
| same pharmacology   | B2AR  | 3NY9-KOL > 2RH1-CAR | LDM 004  | 0.85  | 24.5 | 9.5   | S15 Fig          |
| same pharmacology   | B2AR  | 4LDO-ADR > 4LDL-ISO | 4LDO-ADR | -     | 47.8 | 33.6  | Fig 5            |
| same pharmacology   | B2AR  | 4LDO-ADR > 4LDL-ISO | 4LDL-ISO | 0.0   | 66.2 | 41.7  | Fig 5            |
| same pharmacology   | B2AR  | 4LDO-ADR > 4LDL-ISO | LDM 000  | 0.92  | 38.7 | 25.5  | Fig 5            |
| same pharmacology   | B2AR  | 4LDO-ADR > 4LDL-ISO | LDM 006  | 1.54  | 42.7 | 32.6  | Fig 5            |
| same pharmacology   | B2AR  | 4LDO-ADR > 4LDL-ISO | LDM 015  | 8.99  | 54.6 | 39.5  | Fig 5            |
| same pharmacology   | B2AR  | 4LDO-ADR > 4LDL-ISO | LDM 020  | 1.69  | 46.3 | 40.2  | Fig 5            |
| pharmacology switch | AA2AR | 3QAK-UK > 3EML-ZM   | 3QAK-UK  | -     | 9.1  | -22.0 | S23 Fig          |
| pharmacology switch | AA2AR | 3QAK-UK > 3EML-ZM   | 3EML-ZM  | 0.0   | 28.5 | 7.6   | S23 Fig          |
| pharmacology switch | AA2AR | 3QAK-UK > 3EML-ZM   | LDM 000  | 9.80  | 13.9 | -6.6  | S23 Fig          |
| pharmacology switch | AA2AR | 3QAK-UK > 3EML-ZM   | LDM 016  | 9.64  | 1.1  | -20.0 | S23 Fig          |
| pharmacology switch | AA2AR | 3EML-ZM > 2YDV-NEC  | 3EML-ZM  | -     | 9.5  | -5.7  | S22 Fig          |
| pharmacology switch | AA2AR | 3EML-ZM > 2YDV-NEC  | 2YDV-NEC | 0.0   | 51.2 | 57.3  | S22 Fig          |
| pharmacology switch | AA2AR | 3EML-ZM > 2YDV-NEC  | LDM 000  | 8.79  | 14.7 | 22.4  | S22 Fig          |
| pharmacology switch | AA2AR | 3EML-ZM > 2YDV-NEC  | LDM 002  | 4.40  | -3.1 | 1.4   | S22 Fig          |

|                     |       |                     |          |      |       |       |         |
|---------------------|-------|---------------------|----------|------|-------|-------|---------|
| pharmacology switch | AA2AR | 3EML-ZM > 2YDV-NEC  | LDM 009  | 4.77 | 16.7  | 21.5  | S22 Fig |
| pharmacology switch | B2AR  | 3P0G-BI > 2RH1-CAR  | 3P0G-BI  | -    | 0.0   | -24.1 | Fig 8   |
| pharmacology switch | B2AR  | 3P0G-BI > 2RH1-CAR  | 2RH1-CAR | 0.0  | 61.2  | 34.0  | Fig 8   |
| pharmacology switch | B2AR  | 3P0G-BI > 2RH1-CAR  | LDM 000  | 8.34 | 4.9   | -11.8 | Fig 8   |
| pharmacology switch | B2AR  | 3P0G-BI > 2RH1-CAR  | LDM 006  | 8.75 | 4.3   | -34.5 | Fig 8   |
| pharmacology switch | B2AR  | 3P0G-BI > 2RH1-CAR  | LDM 010  | 8.14 | 2.4   | -18.1 | Fig 8   |
| pharmacology switch | B2AR  | 2RH1-CAR > 3P0G-BI  | 2RH1-CAR | -    | 28.0  | -24.5 | Fig 7   |
| pharmacology switch | B2AR  | 2RH1-CAR > 3P0G-BI  | 3P0G-BI  | 0.0  | 70.4  | 57.7  | Fig 7   |
| pharmacology switch | B2AR  | 2RH1-CAR > 3P0G-BI  | LDM 000  | 2.15 | 70.0  | 61.9  | Fig 7   |
| pharmacology switch | B2AR  | 2RH1-CAR > 3P0G-BI  | LDM 004  | 1.79 | 39.5  | 6.2   | Fig 7   |
| pharmacology switch | M2R   | 4MQS-IXO > 3UON-QNB | 4MQS-IXO | -    | 1.9   | -46.6 | S21 Fig |
| pharmacology switch | M2R   | 4MQS-IXO > 3UON-QNB | 3UON-QNB | 0.0  | 18.1  | 12.0  | S21 Fig |
| pharmacology switch | M2R   | 4MQS-IXO > 3UON-QNB | LDM 000  | 2.75 | 5.5   | -26.8 | S21 Fig |
| pharmacology switch | M2R   | 3UON-QNB > 4MQS-IXO | 3UON-QNB | -    | -2.6  | 3.7   | S20 Fig |
| pharmacology switch | M2R   | 3UON-QNB > 4MQS-IXO | 4MQS-IXO | 0.0  | 34.4  | 78.0  | S20 Fig |
| pharmacology switch | M2R   | 3UON-QNB > 4MQS-IXO | LDM 000  | 8.63 | 6.6   | 12.5  | S20 Fig |
| pharmacology switch | M2R   | 3UON-QNB > 4MQS-IXO | LDM 001  | 2.92 | 23.4  | 18.4  | S20 Fig |
| pharmacology switch | M2R   | 3UON-QNB > 4MQS-IXO | LDM 002  | 2.92 | 20.1  | 14.1  | S20 Fig |
| pharmacology switch | M2R   | 3UON-QNB > 4MQS-IXO | LDM 003  | 8.39 | 18.7  | 12.3  | S20 Fig |
| pharmacology switch | M2R   | 3UON-QNB > 4MQS-IXO | LDM 018  | 3.05 | -16.9 | 6.2   | S20 Fig |
