# Supplementary material for: Improving virtual screening of G protein-coupled receptors via ligand-directed modeling
Source: PubMed Central journal article supplement (PMC5708846; doi:10.1371/journal.pcbi.1005819), 2017-11-13

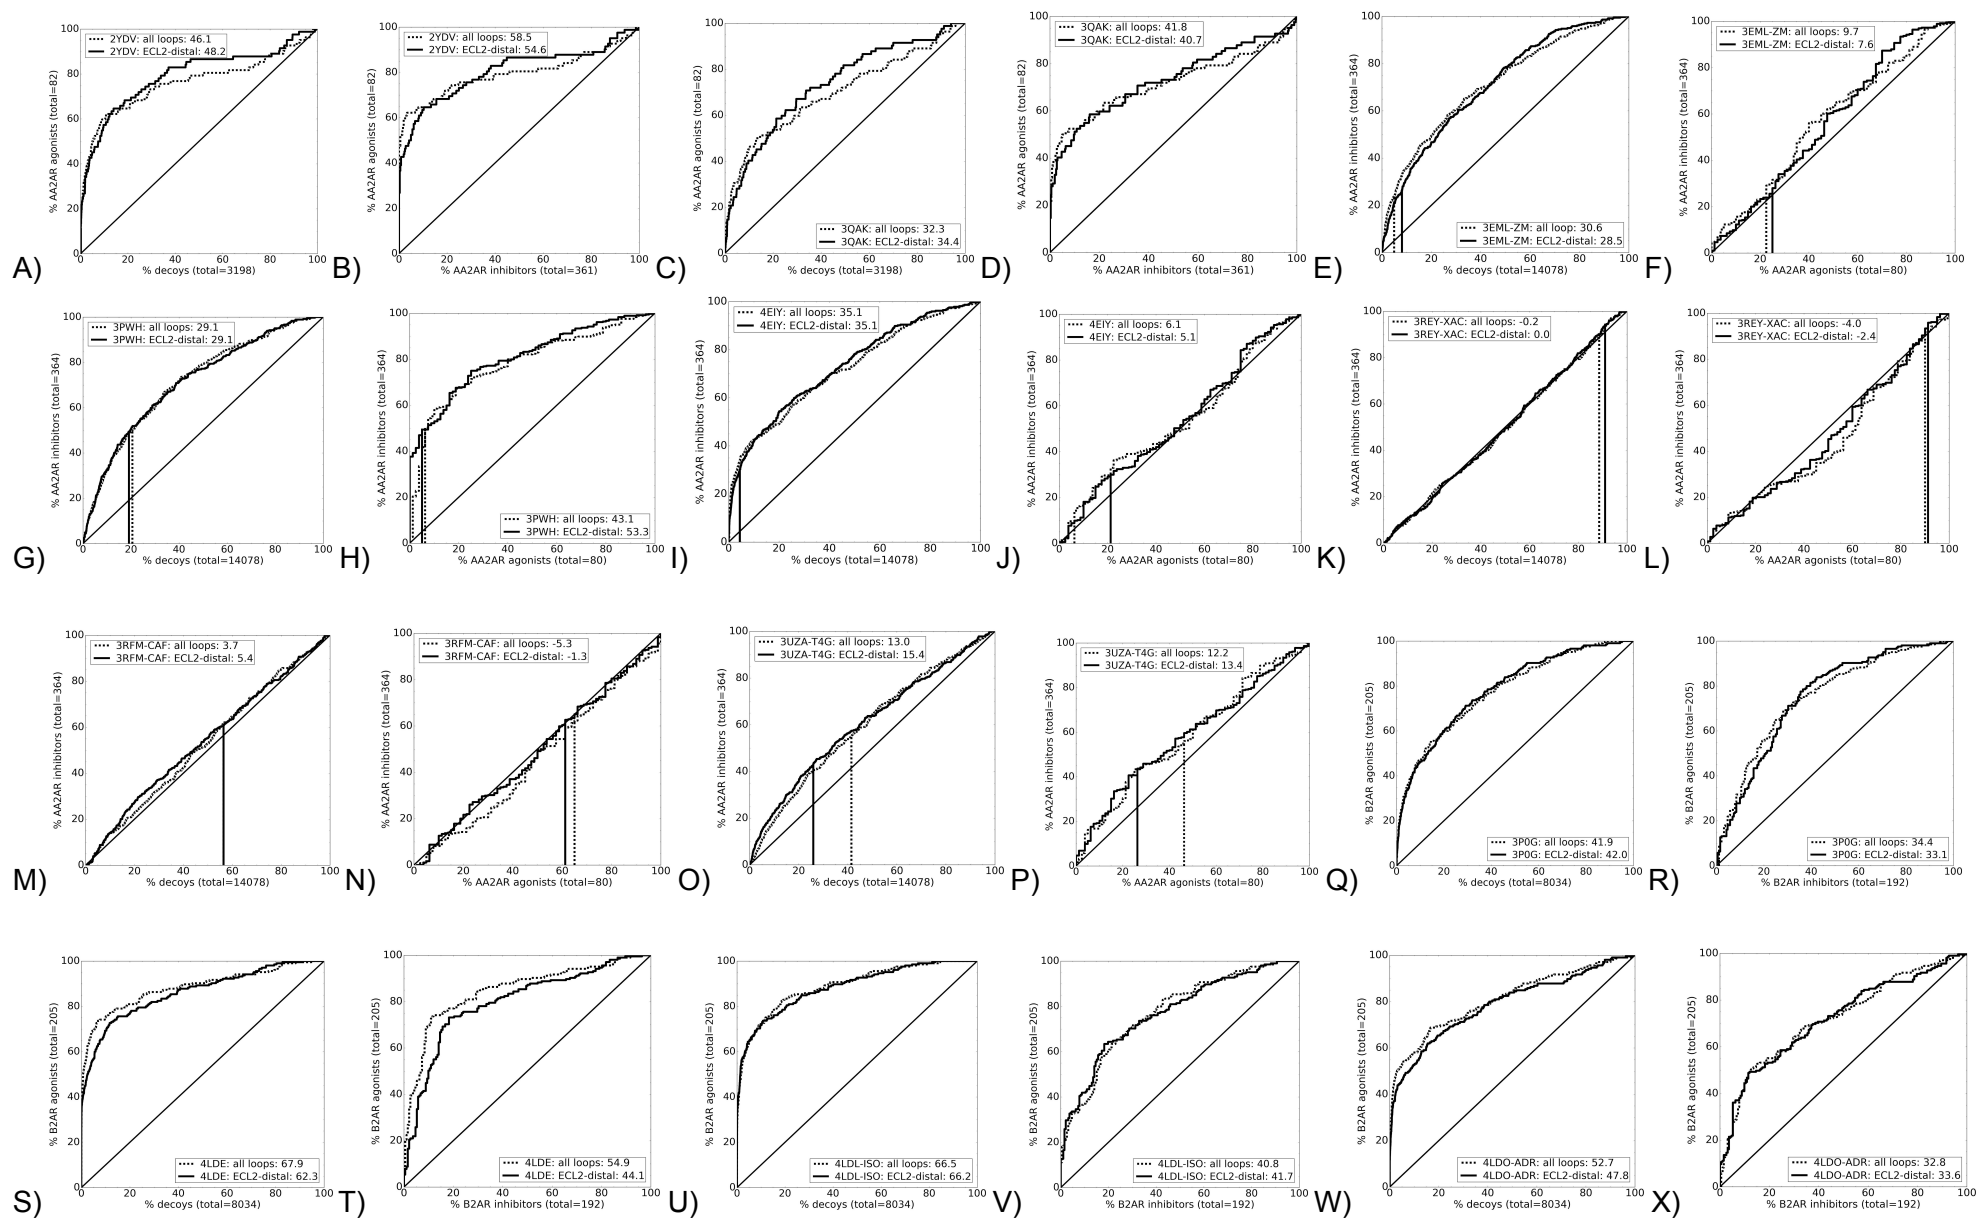

Supplement: pcbi.1005819.s007.pdf [file pcbi.1005819.s007.pdf]
